# Supplementary material for: Qualitätssicherungssystem zur Bewertung eines HNO-Facharztrepetitoriums
Source: Springer Nature journal article supplement (doi:10.1007/s00106-021-01065-6), 2021-06-09
Supplement: MOESM1 [file 19243586]

## Repetitorium ORL – Evaluation der Unterrichtseinheit

Der Fragebogen wurde von der AG Lehrevaluation (MHH) entwickelt und wird in Kooperation mit dem Repetitorium ORL eingesetzt.  
Die Auswertung erfolgt selbstverständlich strikt anonym!

Sie können mit Ihren Einschätzungen dazu beitragen, dass die Qualität der Lehre gesteuert und verbessert wird. Bitte füllen Sie deshalb den Fragebogen sorgfältig und vollständig aus. Nur so ist es möglich, aufgrund Ihrer Bewertungen auch kurzfristig Konsequenzen zu ziehen. Ihre Bewertungen können Sie - sofern nicht anders angegeben - auf den vorgegebenen Skalen abstimmen.

Name der/s Dozentin/Dozenten:

Datum:

### Die Dozentin / Der Dozent

|                                                                    |                          | Trifft voll<br>zu        |                          |                          |                          |                          | Trifft gar<br>nicht zu   |
|--------------------------------------------------------------------|--------------------------|--------------------------|--------------------------|--------------------------|--------------------------|--------------------------|--------------------------|
| ... war pünktlich anwesend.                                        | <input type="checkbox"/> | <input type="checkbox"/> | <input type="checkbox"/> | <input type="checkbox"/> | <input type="checkbox"/> | <input type="checkbox"/> | <input type="checkbox"/> |
| ... präsentierte den Stoff sicher.                                 | <input type="checkbox"/> | <input type="checkbox"/> | <input type="checkbox"/> | <input type="checkbox"/> | <input type="checkbox"/> | <input type="checkbox"/> | <input type="checkbox"/> |
| ... verwendete anschauliche Beispiele.                             | <input type="checkbox"/> | <input type="checkbox"/> | <input type="checkbox"/> | <input type="checkbox"/> | <input type="checkbox"/> | <input type="checkbox"/> | <input type="checkbox"/> |
| ... hielt die Aufmerksamkeit durch seinen/ihren Stil.              | <input type="checkbox"/> | <input type="checkbox"/> | <input type="checkbox"/> | <input type="checkbox"/> | <input type="checkbox"/> | <input type="checkbox"/> | <input type="checkbox"/> |
| ... begrüßte die Mitarbeit/Nachfragen der Teilnehmer.              | <input type="checkbox"/> | <input type="checkbox"/> | <input type="checkbox"/> | <input type="checkbox"/> | <input type="checkbox"/> | <input type="checkbox"/> | <input type="checkbox"/> |
| ... war freundlich.                                                | <input type="checkbox"/> | <input type="checkbox"/> | <input type="checkbox"/> | <input type="checkbox"/> | <input type="checkbox"/> | <input type="checkbox"/> | <input type="checkbox"/> |
| ... hatte ein zu hohes Tempo.                                      | <input type="checkbox"/> | <input type="checkbox"/> | <input type="checkbox"/> | <input type="checkbox"/> | <input type="checkbox"/> | <input type="checkbox"/> | <input type="checkbox"/> |
| ... erklärte komplexe Sachverhalte verständlich.                   | <input type="checkbox"/> | <input type="checkbox"/> | <input type="checkbox"/> | <input type="checkbox"/> | <input type="checkbox"/> | <input type="checkbox"/> | <input type="checkbox"/> |
| <b>Allgemeine Fragen:</b>                                          |                          |                          |                          |                          |                          |                          |                          |
| Es wurden konkrete Lernziele für diese Unterrichtseinheit genannt. | <input type="checkbox"/> | <input type="checkbox"/> | <input type="checkbox"/> | <input type="checkbox"/> | <input type="checkbox"/> | <input type="checkbox"/> | <input type="checkbox"/> |
| Die Unterrichtseinheit hatte einen systematischen Aufbau.          | <input type="checkbox"/> | <input type="checkbox"/> | <input type="checkbox"/> | <input type="checkbox"/> | <input type="checkbox"/> | <input type="checkbox"/> | <input type="checkbox"/> |
| Ich konnte gut mitarbeiten.                                        | <input type="checkbox"/> | <input type="checkbox"/> | <input type="checkbox"/> | <input type="checkbox"/> | <input type="checkbox"/> | <input type="checkbox"/> | <input type="checkbox"/> |
| Mit meinem Vorwissen konnte ich inhaltlich gut folgen.             | <input type="checkbox"/> | <input type="checkbox"/> | <input type="checkbox"/> | <input type="checkbox"/> | <input type="checkbox"/> | <input type="checkbox"/> | <input type="checkbox"/> |
| Das Niveau dieser Unterrichtseinheit war zu hoch.                  | <input type="checkbox"/> | <input type="checkbox"/> | <input type="checkbox"/> | <input type="checkbox"/> | <input type="checkbox"/> | <input type="checkbox"/> | <input type="checkbox"/> |
| Der Inhalt dieser Unterrichtseinheit ist für mich relevant.        | <input type="checkbox"/> | <input type="checkbox"/> | <input type="checkbox"/> | <input type="checkbox"/> | <input type="checkbox"/> | <input type="checkbox"/> | <input type="checkbox"/> |

**Bitte füllen Sie auch die zweite Seite aus!**

**Allgemeine Fragen:**

Der Inhalt dieser Unterrichtseinheit hat mich interessiert.

Diese Unterrichtseinheit war verglichen mit dem Eigenstudium effizient.

Trifft voll zu

Trifft überhaupt

**Wissen:**

Wie würden Sie Ihr Wissen VOR der Unterrichtseinheit einstufen?

Wie würden Sie Ihr Wissen NACH der Unterrichtseinheit einstufen?

sehr gut

gut

befriedigend

ausreichend

mangelhaft

ungenügend

**Globale Bewertung der Unterrichtseinheit:**

Wie beurteilen Sie das Seminar insgesamt? (0 Pkt. = ungenügend 3 Pkt. = mangelhaft 6 Pkt. = ausreichend 9 Pkt.= befriedigend 12 Pkt. = gut 15 Pkt. = sehr gut)

0 1 2 3 4 5 6 7 8 9 10 11 12 13 14 15

**Weitere Anmerkungen (Lob und Kritik):**

---



---



---

Der **persönliche Code** ermöglicht eine anonyme Zuordnung zu anderen Befragungen. Der (maschinenlesbare) Code setzt sich aus Daten zusammen, die nur Sie kennen und von Ihnen jederzeit wieder gebildet werden können: Zuerst der Anfangsbuchstabe des Vornamens Ihrer Mutter (z.B. Karin = K), dann der Geburtsmonat Ihrer Mutter als Zahl (z.B. März = 3), danach die gleichen Angaben für Ihren Vater, schließlich Ihr Geschlecht (W = weiblich, M = männlich), Ihr Geburtsjahr (2stellig, z.B. 1980 = 80) und das Weiterbildungsjahr (2stellig, z.B. 4. Jahr = 04).

Anfangsbuchstabe Vorname Mutter

Geburtsmonat Mutter

Anfangsbuchstabe Vorname Vater

Geburtsmonat Vater

Ihr Geschlecht

Ihr Geburtsjahr 2stellig

Weiterbildungsjahr 2stellig
